# Supplementary material for: Effect of the Application of <em>Ochrobactrum </em>sp.-Immobilised Biochar on the Remediation of Diesel-Contaminated Soil
Source: Preprints.org preprint supplement (doi:10.20944/preprints202401.1336.v1), 2024-01-17
Supplement: Supplementary file 1 [file supplementary]

## Supplementary file

### Effect of the application of *Ochrobactrum* sp.-immobilised biochar on the remediation of diesel-contaminated soil

Charles Chinyere Dike<sup>12\*</sup>, Alka Rani<sup>123</sup>, Leadin Khudur<sup>12</sup>, Kamrun Nahar<sup>4</sup>, Andy Ball<sup>12</sup>

<sup>1</sup>ARC Training Centre for Transformation of Australia's Biosolids Centre, RMIT University, Bundoora, Melbourne, Vic 3083, Australia

<sup>2</sup>School of Science, RMIT University, Bundoora, Melbourne, Vic 3083, Australia

<sup>3</sup>Environment Protection Authority Victoria, Centre for Applied Sciences, Ernest Jones Drive, Macleod Victoria, 3085, Australia

<sup>4</sup>School of Engineering, RMIT University, Melbourne, Vic 3000, Australia

\*Corresponding author: [charles.dike@student.rmit.edu.au](mailto:charles.dike@student.rmit.edu.au)

## **Materials and Methodology**

### **Text S1: Polymerase chain reaction (PCR) and gel electrophoresis for primer**

Polymerase Chain Reaction (PCR) was carried out in triplicate using the initial denaturation of 94 °C (4 min), followed by 35 cycles of 94 °C (30 s), 56 °C (30 s), and 72 °C (1 min) with a final extension of 15 min at 72 °C [39]. An aliquot (25 µL) was used for PCR, comprising of 2 x MIFI (12.5), 4 µL primer mix (10 µM each primer), 2 µL of template DNA of the bacteria and 8.5 µL PCR grade water. Following completion of the PCR run, a 5 µL PCR mixture was used to check for amplification on a 2% agarose gel in 1 x Tris-acetate-EDTA (TAE) buffer stained with SYBR safe DNA gel stain (Invitrogen, Massachusetts, USA).

## Results

**Table S1: Proximate analysis of pristine biochar and bacteria immobilised biochar**

|                                     | Pristine biochar | Bacteria<br>immobilised biochar |
|-------------------------------------|------------------|---------------------------------|
| <b>Proximate analysis (wt% d.b)</b> |                  |                                 |
| Moisture content (%)                | 0.42 ± 0.26      | 0.49 ± 0.30                     |
| Volatile matter (%)                 | 3.15 ± 0.21      | 3.95 ± 0.21                     |
| Fixed carbon (%)                    | 20.18 ± 5.26     | 25.26 ± 0.34                    |
| Ash content (%)                     | 76.26 ± 4.79     | 70.30 ± 0.85                    |

Values are mean of duplicate and the standard deviation of the mean.

**Table S2: First-order kinetics equation, rate constant (k), half-life ( $t_{1/2}$ ) and  $R^2$  and of the different treatments.**

| Treatments | First order kinetic<br>equation | k (day <sup>-1</sup> ) | $t_{1/2}$ (days) | $R^2$ |
|------------|---------------------------------|------------------------|------------------|-------|
| C          | $y = -0.0044x + 11.096$         | 0.0044                 | 157              | 0.97  |
| B          | $y = -0.0047x + 11.108$         | 0.0047                 | 147              | 0.95  |
| F          | $y = -0.0038x + 11.176$         | 0.0038                 | 182              | 0.84  |
| BC         | $y = -0.0049x + 11.006$         | 0.0049                 | 141              | 0.96  |
| BCF        | $y = -0.0046x + 11.114$         | 0.0046                 | 151              | 0.95  |
| BIB        | $y = -0.0053x + 10.991$         | 0.0053                 | 131              | 0.99  |
| BIBF       | $y = -0.0043x + 11.092$         | 0.0043                 | 161              | 0.98  |

C: Control; B: Bacteria; F: 2% Fertiliser; BC: 5% w/w Biochar; BCF: 5% w/w Biochar + 2% Fertiliser; BIB: Bacteria immobilised biochar; BIBF: Bacteria immobilised biochar + 2% Fertiliser.

**Table S3: Estimated time to achieve a concentration of 995 – 997 mg/kg, which is lower than the EPA Victoria fill soil threshold (1,000 mg/kg) in the different treatments**

|      | <b>Time (weeks)</b> | <b>TPH conc at that time<br/>(mg/kg)</b> |
|------|---------------------|------------------------------------------|
| C    | 134                 | 996                                      |
| B    | 126                 | 996                                      |
| F    | 155                 | 997                                      |
| BC   | 120                 | 996                                      |
| BCF  | 128                 | 997                                      |
| BIB  | 111                 | 996                                      |
| BIBF | 137                 | 995                                      |

C: Control; B: Bacteria; F: 2% Fertiliser; BC: 5% w/w Biochar; BCF: 5% w/w Biochar + 2% Fertiliser; BIB: Bacteria immobilised biochar; BIBF: Bacteria immobilised biochar + 2% Fertiliser.

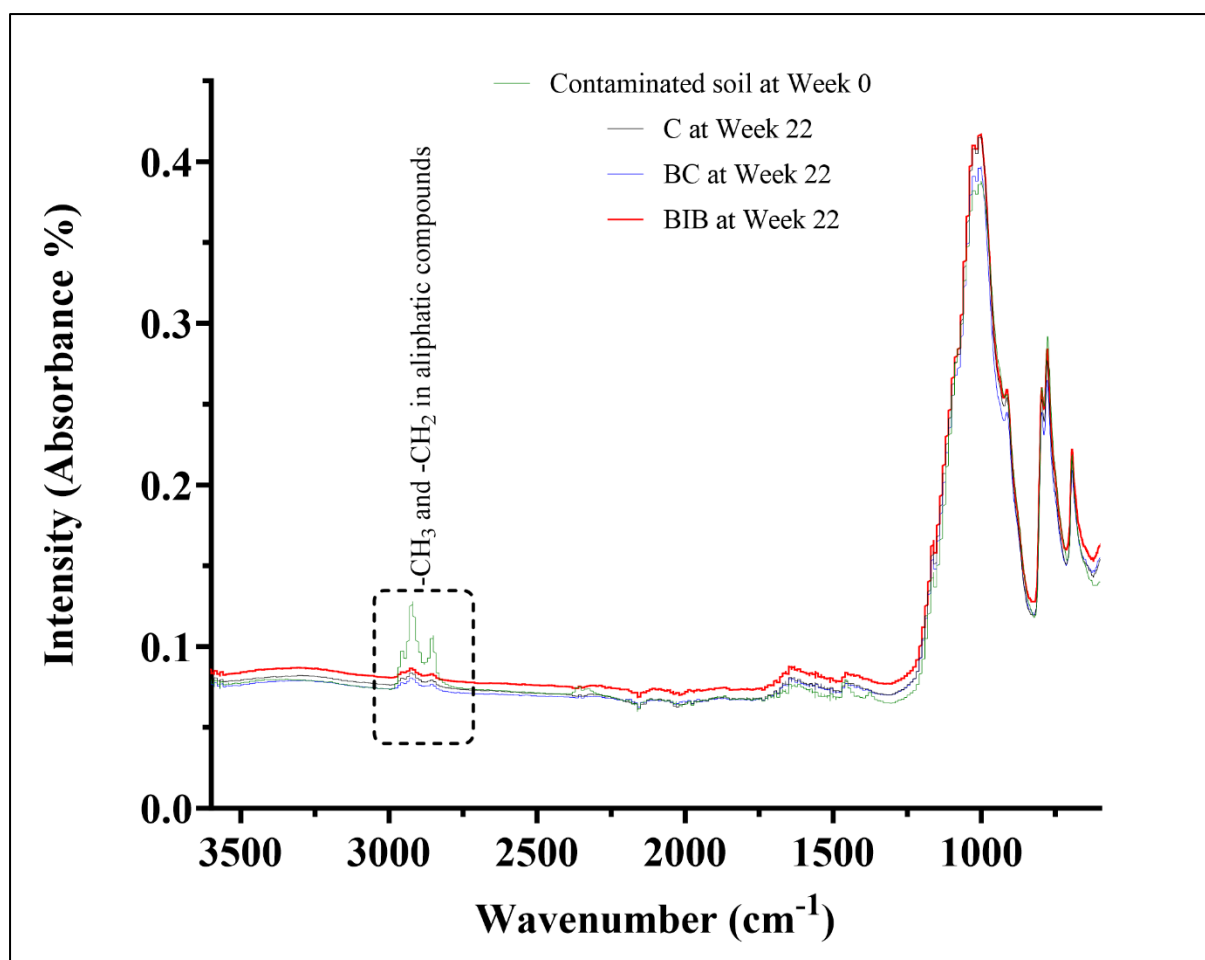

Figure S1: FTIR spectra of the C, BC, and BIB treatment at week 22 versus the contaminated soil at week 0.

C: Control; BC: 5% w/w Biochar; and BIB: Bacteria immobilised biochar

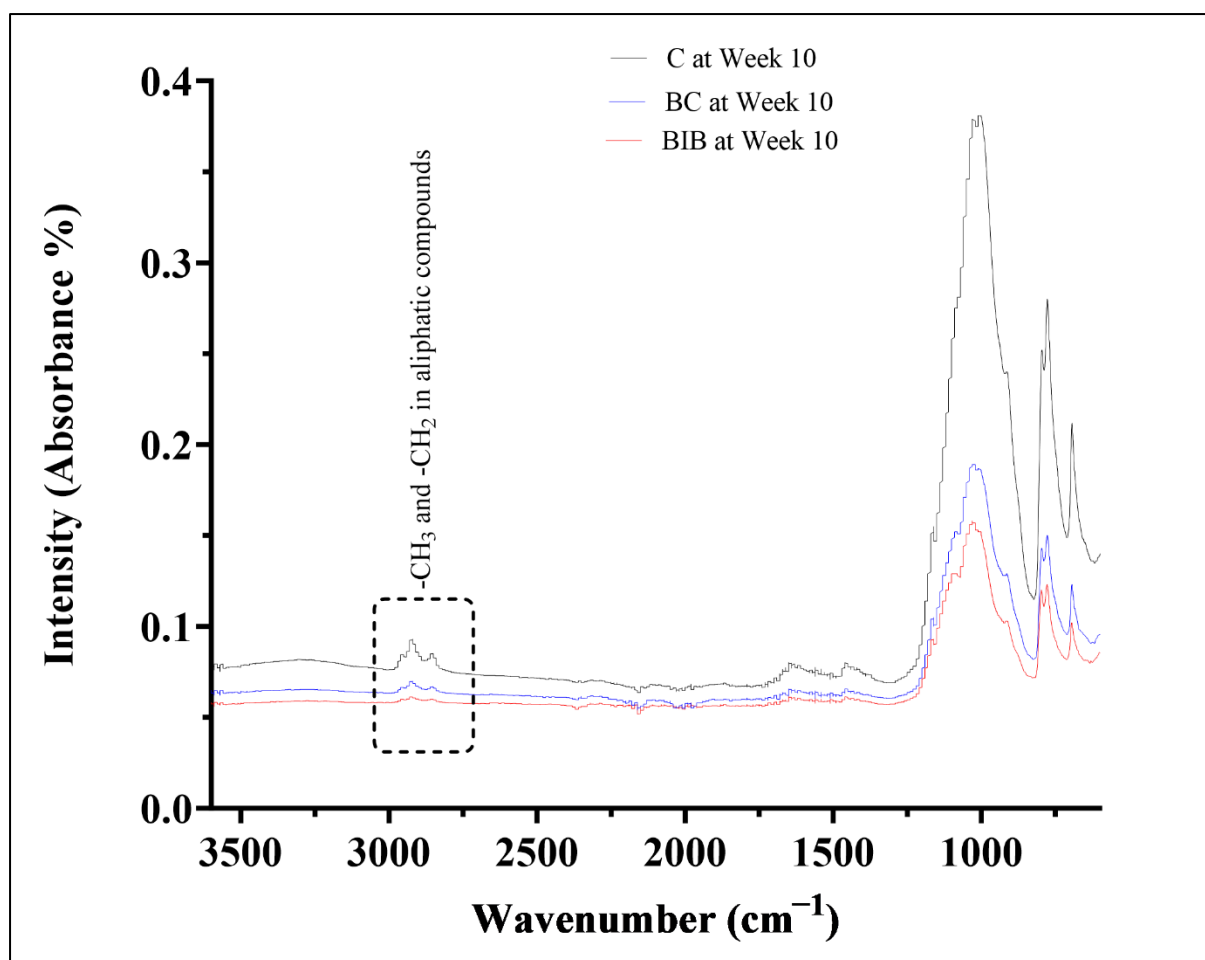

Figure S2: FTIR spectra of the treatment C, BC, and BIB at week 10.

C: Control; BC: 5% w/w Biochar; and BIB: Bacteria immobilised biochar
