# Supplementary material for: Effect of the Application of <em>Ochrobactrum </em>sp.-Immobilised Biochar on the Remediation of Diesel-Contaminated Soil
Source: Preprints.org preprint supplement (doi:10.20944/preprints202401.1336.v1), 2024-01-17
Supplement: Supplementary file 2 [file supplementary]

Archive with 1 entries (1 files):
- supplementary file - third experiment 15 January 2024 for submission toxics.pdf
